# Supplementary material for: A sensitive colorimetric and ratiometric fluorescent chemodosimeter for Hg2+and its application for bioimaging
Source: Royal Society of Chemistry journal article supplement (doi:10.1039/c3nj00766a), 2013-09-24
Supplement: c3nj00766a.pdf [file c3nj00766a.pdf]

Electronic Supplementary Information (ESI) for New Journal of Chemistry

## Electronic Supplementary Information

### **A Sensitive Colorimetric and Ratiometric Fluorescent Chemodosimeter for Hg<sup>2+</sup> and Its Application for Bioimaging**

Huie Jiang<sup>a</sup>, Jie Jiang<sup>a</sup>, Ju Cheng<sup>b</sup>, Wei Dou<sup>a</sup>, Xiaoliang Tang<sup>a</sup>, Lizi Yang<sup>a</sup>, Weisheng Liu<sup>\*a</sup>, and Decheng Bai<sup>\*b</sup>

<sup>a</sup>Key Laboratory of Nonferrous Metals Chemistry and Resources Utilization of Gansu Province and State Key Laboratory of Applied Organic Chemistry, College of Chemistry and Chemical Engineering, Lanzhou University, Lanzhou 730000, P. R. China

<sup>b</sup>Key Lab of Preclinical Study for New Drugs of Gansu Province and Operative Surgery Institute, School of Basic Medical Sciences, Lanzhou University, Lanzhou 730000, P. R. China.

\*Corresponding author. Tel: +86/931/8915151

Fax number: +86/931/8912582

E/mail: [liuws@lzu.edu.cn](mailto:liuws@lzu.edu.cn)

### **Contents**

|                                                     |           |
|-----------------------------------------------------|-----------|
| <b>1. Fluorescence spectra.....</b>                 | <b>S2</b> |
| <b>2. Determination of the detection limit.....</b> | <b>S4</b> |
| <b>3. NMR Data.....</b>                             | <b>S6</b> |

## 1. Fluorescence spectra

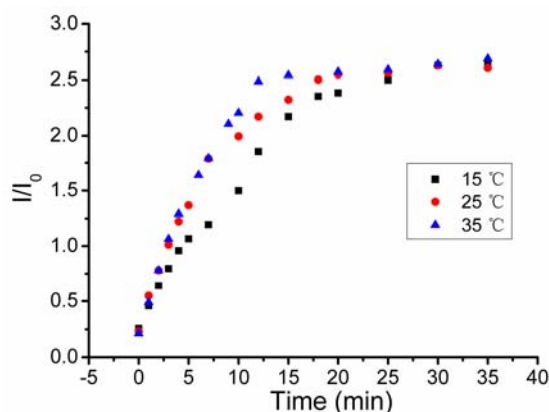

**Fig. S1.** The time-dependent fluorescence intensity change acquired for a mixture of 5  $\mu\text{M}$  **1** and 5  $\mu\text{M}$   $\text{HgCl}_2$  at 15 °C, 25 °C and 35 °C in PBS buffer solutions (containing 1%  $\text{CH}_3\text{CN}$ ). Ex = 408 nm. Slit: 10.0 nm/10.0 nm.

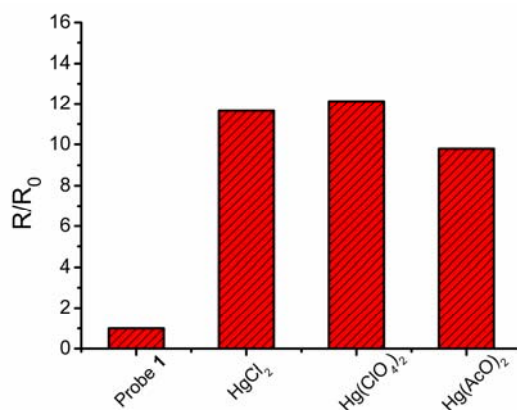

**Fig. S2.** Fluorescence responses of **1** (5  $\mu\text{M}$ ) to mercury metal sources:  $\text{HgCl}_2$  (5  $\mu\text{M}$ ),  $\text{Hg}(\text{ClO}_4)_2$  (5  $\mu\text{M}$ ) and  $\text{Hg}(\text{OAc})_2$  (5  $\mu\text{M}$ ), in PBS buffer solutions (pH = 7.4, containing 1%  $\text{CH}_3\text{CN}$ ). Bars represent the ratio of the fluorescence intensity ratio in the presence (R) and absence ( $R_0$ ) of mercury metal sources.  $R = I_{550 \text{ nm}}/I_{506 \text{ nm}}$ , Ex = 408 nm. Slit: 10.0 nm/10.0 nm. Each spectrum was acquired 30 min after mercury metal sources addition.

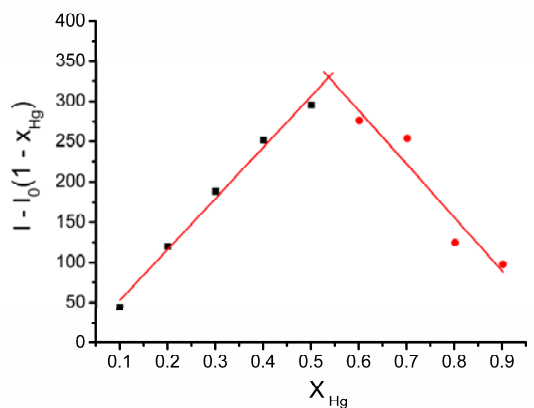

**Fig. S3.** Job's plot for determining the stoichiometry of **1** and Hg<sup>2+</sup> in PBS buffer solutions (pH = 7.4, containing 1% CH<sub>3</sub>CN); The total concentration of **1** and Hg<sup>2+</sup> was 5 μM; X<sub>Hg</sub> = [Hg<sup>2+</sup>]/([Hg<sup>2+</sup>] + [**1**]); Ex = 408 nm. Slit: 10.0 nm/10.0 nm.

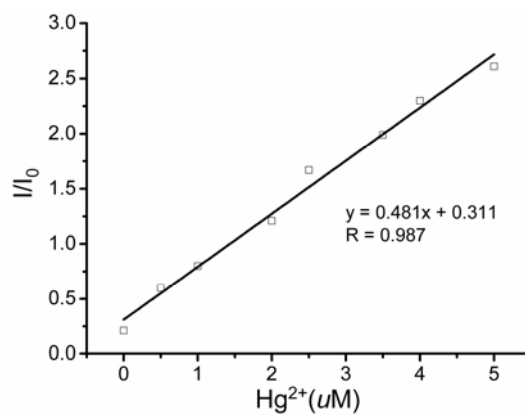

**Fig. S4.** Fluorescence spectra of **1** in the presence of increasing concentrations of HgCl<sub>2</sub> (0, 0.5, 1, 2, 2.5, 3.5, 4, 5 μM) in PBS buffer solutions (containing 1% CH<sub>3</sub>CN). Ex = 408 nm. Slit: 10.0 nm/10.0 nm. Each spectrum was acquired 15 min after HgCl<sub>2</sub> addition at 25 °C.

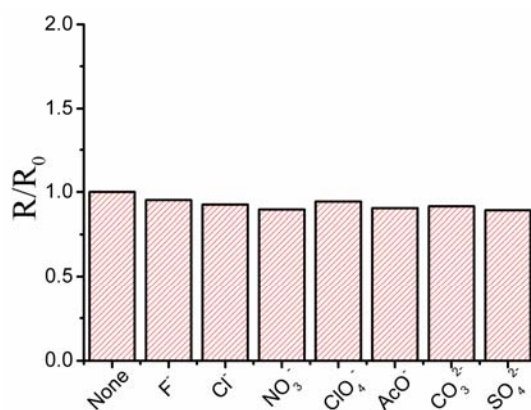

**Fig. S5.** Fluorescence spectra of **1** (5  $\mu\text{M}$ ) in the absence and presence of different anions (5 equiv): F<sup>-</sup>, Cl<sup>-</sup>, NO<sub>3</sub><sup>-</sup>, ClO<sub>4</sub><sup>-</sup>, AcO<sup>-</sup>, CO<sub>3</sub><sup>2-</sup> and SO<sub>4</sub><sup>2-</sup> (as their Na<sup>+</sup> or K<sup>+</sup> salts) in PBS buffer solutions (pH = 7.4, containing 1% CH<sub>3</sub>CN). Bars represent the ratio of the fluorescence intensity ratio in the presence (R) and absence (R<sub>0</sub>) of various anions. R = I<sub>550 nm</sub>/I<sub>506 nm</sub>, Ex = 408 nm. Slit: 10.0 nm/10.0 nm. Each spectrum was acquired 30 min after anions addition at 25 °C.

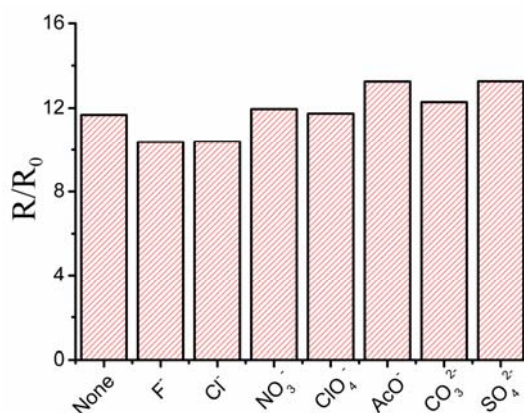

**Fig. S6.** Fluorescence spectra of **1-Hg<sup>2+</sup>** system (5  $\mu\text{M}$ ) in the absence and presence of different anions (5 equiv): F<sup>-</sup>, Cl<sup>-</sup>, NO<sub>3</sub><sup>-</sup>, ClO<sub>4</sub><sup>-</sup>, AcO<sup>-</sup>, CO<sub>3</sub><sup>2-</sup> and SO<sub>4</sub><sup>2-</sup> (as their Na<sup>+</sup> or K<sup>+</sup> salts) in PBS buffer solutions (pH = 7.4, containing 1% CH<sub>3</sub>CN). Bars represent the ratio of the fluorescence intensity ratio in the presence (R) and absence (R<sub>0</sub>) of various anions. R = I<sub>550 nm</sub>/I<sub>506 nm</sub>, Ex = 408 nm. Slit: 10.0 nm/10.0 nm. Each spectrum was acquired 30 min after anions addition at 25 °C.

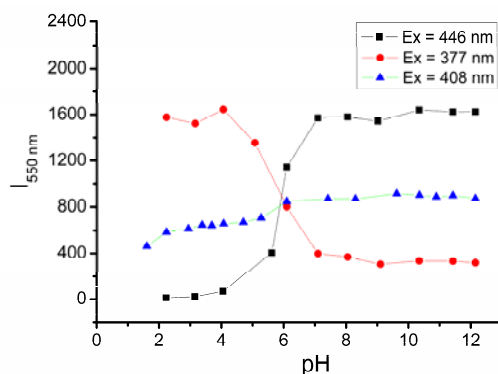

**Fig. S7** The fluorescence intensity of **2** (5  $\mu$ M) as a function of pH in aqueous solutions (containing 1% CH<sub>3</sub>CN).

## 2. Determination of the detection limit

The detection limit was calculated based on the fluorescence titration. The fluorescence emission spectrum of **1** was measured by ten times and the standard deviation of blank measurement was achieved. To gain the slope, the ratio of the fluorescence intensity at 550 nm to the fluorescence intensity at 506 nm ( $I_{550 \text{ nm}}/I_{506 \text{ nm}}$ ) was plotted as a concentration of Hg<sup>2+</sup>. So the detection limit was calculated with the following equation:

$$\text{Detection limit} = 3\sigma/k$$

Where  $\sigma$  is the standard deviation of blank measurement,  $k$  is the slope between the fluorescence intensity ratios versus Hg<sup>2+</sup>.

The detection limits for Hg<sup>2+</sup> concentration were deduced to be 3.6 nM.

### 3. NMR Data

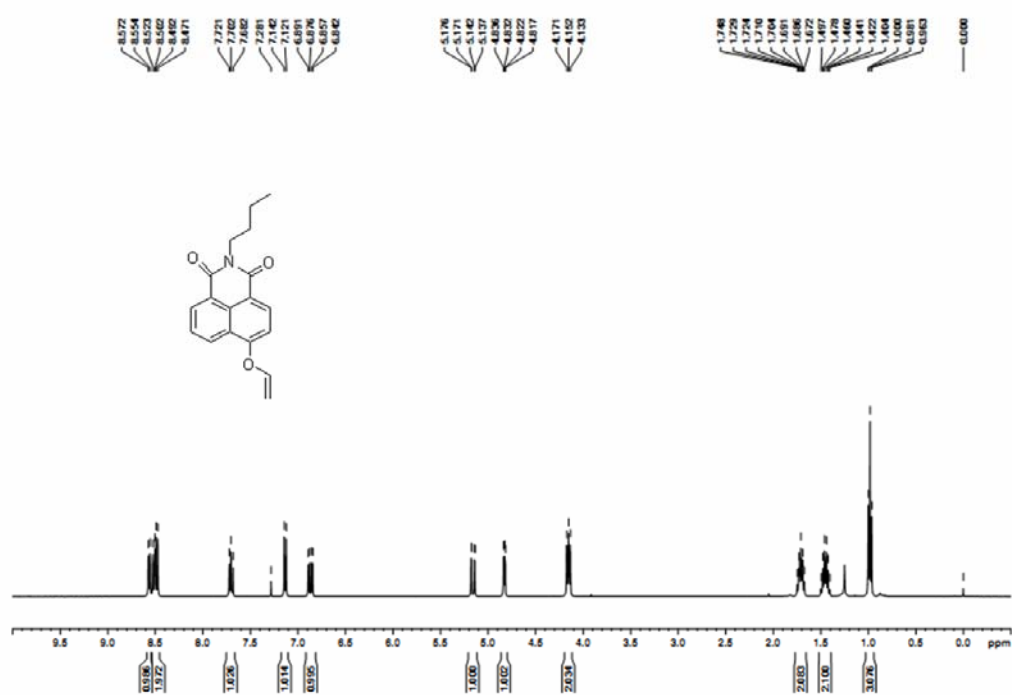

**Fig. S8** <sup>1</sup>H NMR spectrum of chemodosimeter 1 (CDCl<sub>3</sub>)

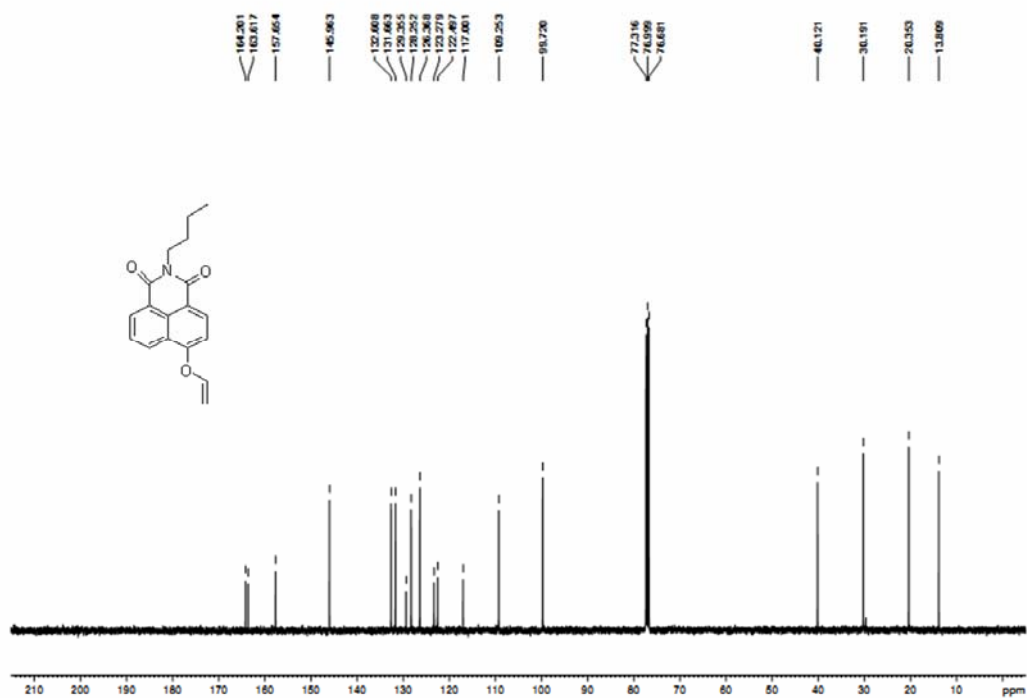

**Fig. S9** <sup>13</sup>C NMR spectrum of chemodosimeter 1 (CDCl<sub>3</sub>)

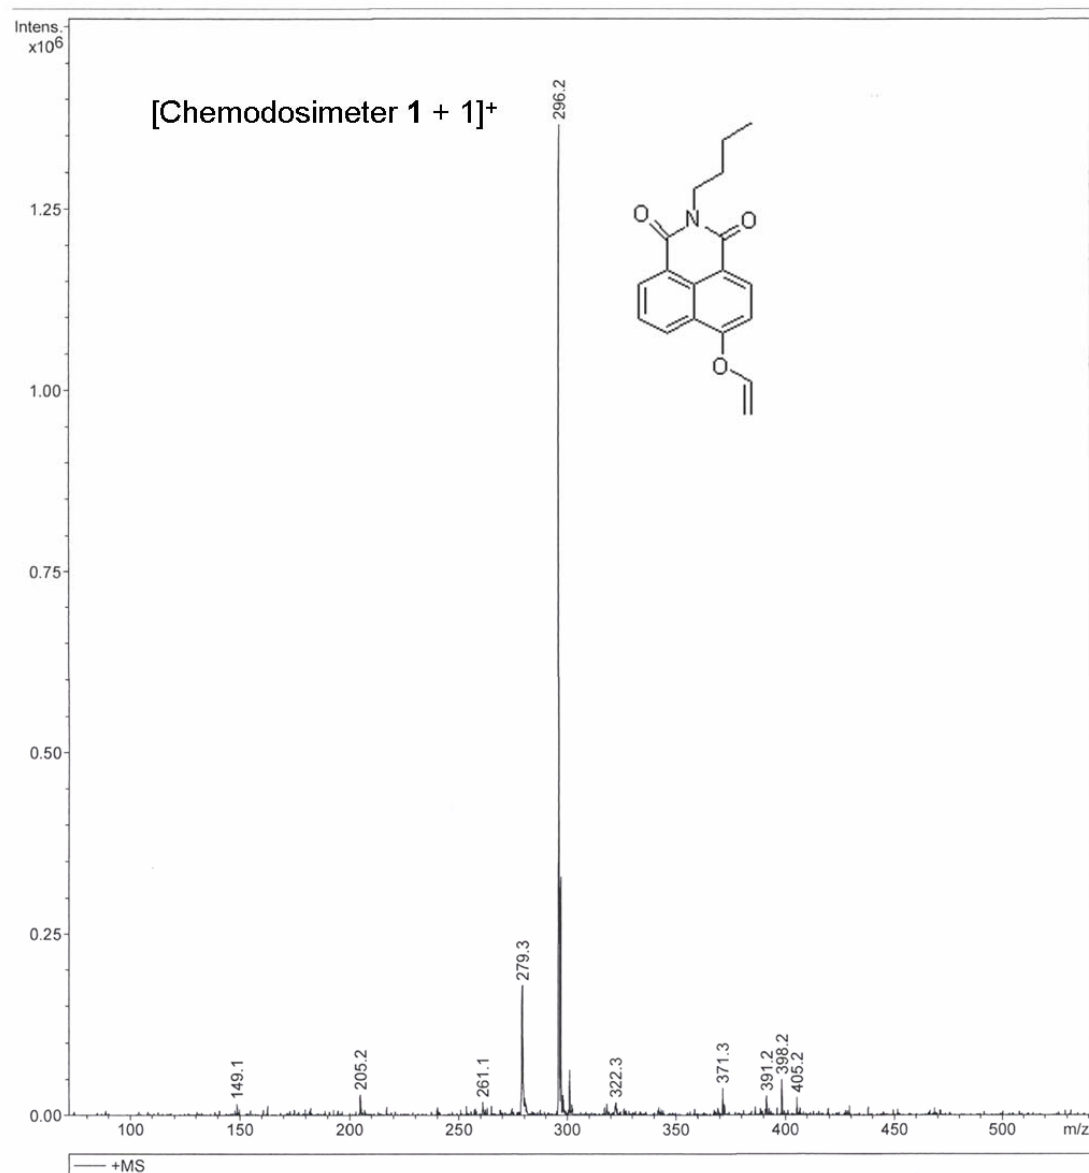

**Fig. S10** ESI-mass spectrum of chemodosimeter **1**

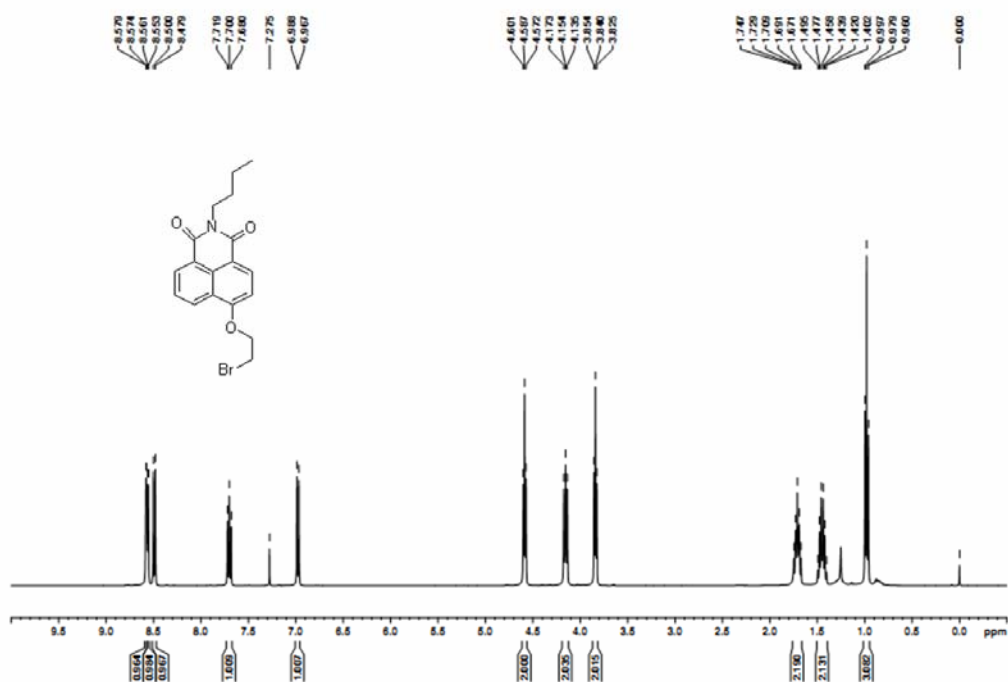

**Fig. S11** <sup>1</sup>H NMR spectrum of compound **3** (CDCl<sub>3</sub>)

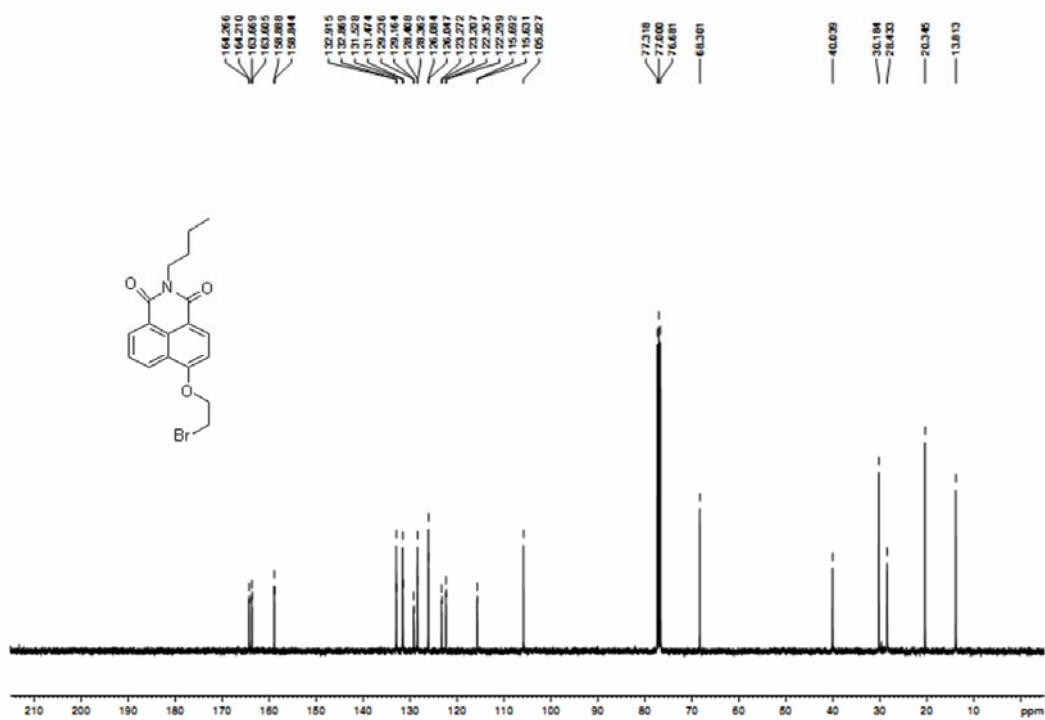

**Fig. S12** <sup>13</sup>C NMR spectrum of compound **3** (CDCl<sub>3</sub>)



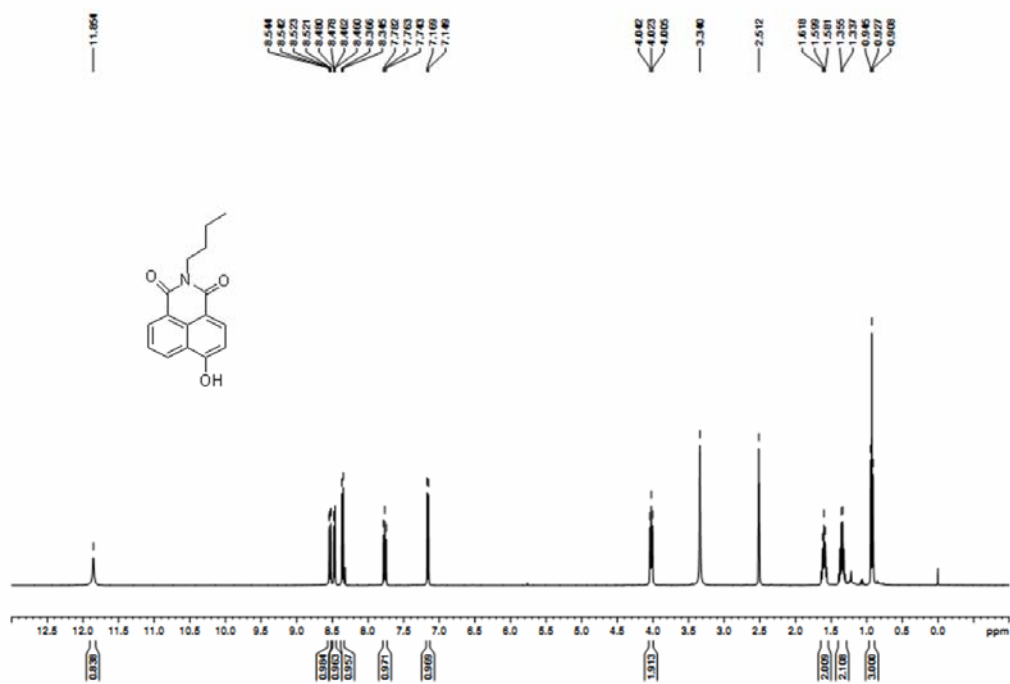

Fig. S13  $^1\text{H}$  NMR spectrum of compound 2 ( $d_6$ -DMSO)

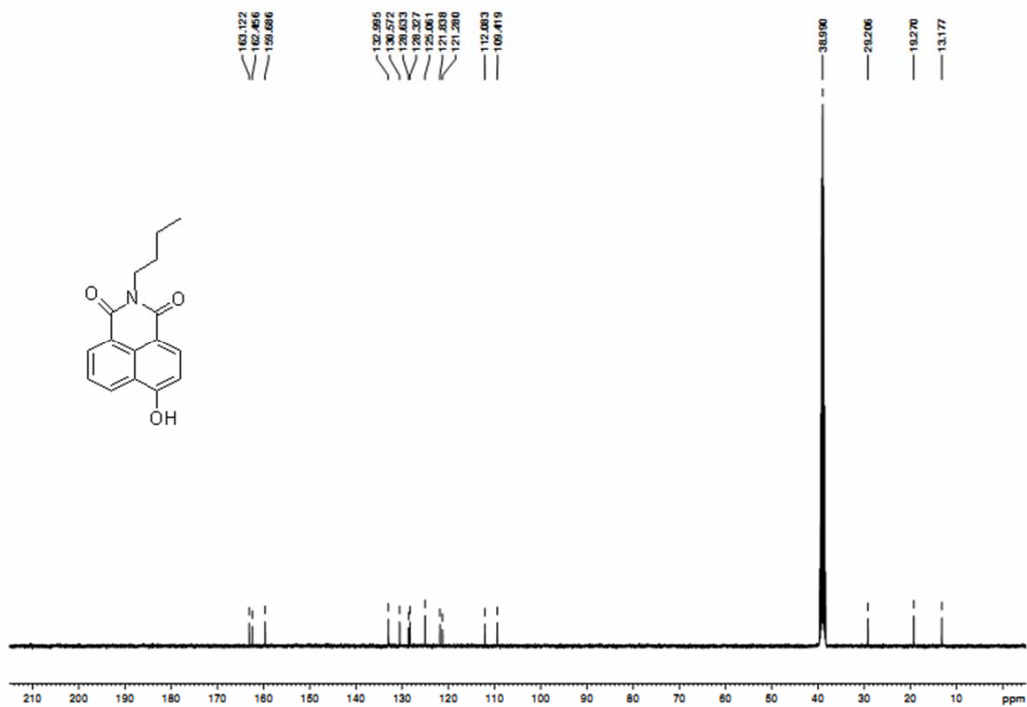

Fig. S14  $^{13}\text{C}$  NMR spectrum of compound 2 ( $d_6$ -DMSO)

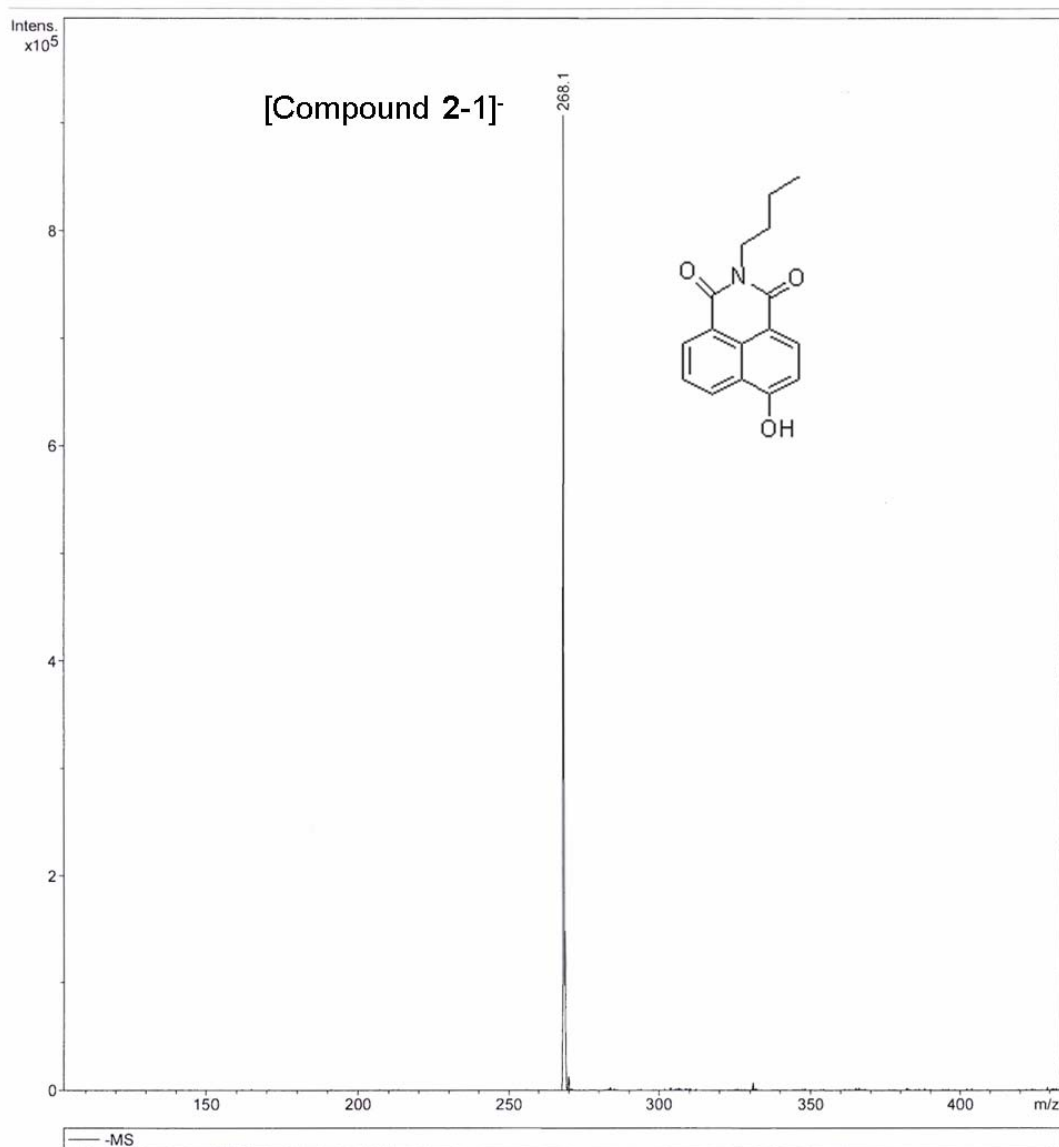

**Fig. S15** ESI-mass spectrum of compound 2
